# Supplementary material
Source: MDPI journal article supplement (https://www.mdpi.com/2227-7390/11/19/4070)
Supplement: s1 [file s1]

# Supplementary Materials

**Table S1.** Number of participants with missing data for each variable, expressed in absolute and relative frequencies, for the final sample composed by 307 children.

|                                                     | <i>n</i> = 307 |
|-----------------------------------------------------|----------------|
| <b>Parental characteristics</b>                     |                |
| Mother age at delivery (years)                      | 0 (0.0%)       |
| Mother origin country                               | 0 (0.0%)       |
| Mother level of education                           | 0 (0.0%)       |
| Mother social class                                 | 1 (0.3%)       |
| Mother smoking during pregnancy                     | 15 (4.9%)      |
| Mother BMI (kg/m <sup>2</sup> )                     | 0 (0.0%)       |
| Father BMI (kg/m <sup>2</sup> )                     | 11 (3.6%)      |
| Parental cardiovascular antecedents                 | 0 (0.0%)       |
| <b>Child characteristics</b>                        |                |
| Sex                                                 | 0 (0.0%)       |
| Age (years)                                         | 5 (1.6%)       |
| Week of gestation at delivery                       | 6 (2.0%)       |
| Predominant breastfeeding duration (weeks)          | 37 (12.1%)     |
| Birth weight (gr)                                   | 6 (2.0%)       |
| <b>At 4 years</b>                                   |                |
| Mean daily energy intake (cals)                     | 8 (2.6%)       |
| Weekly out-of-school physical activity time (hours) | 12 (3.9%)      |
| Weight (kg)                                         | 6 (2.0%)       |
| Height (cm)                                         | 6 (2.0%)       |
| BMI (kg/m <sup>2</sup> )                            | 4 (1.3%)       |
| Waist circumference (cm)                            | 7 (2.3%)       |
| Waist circumference/Height ratio                    | 7 (2.3%)       |
| Triponderal index (kg/m <sup>3</sup> )              | 6 (2.0%)       |
| Systolic blood pressure                             | 7 (2.3%)       |
| Diastolic blood pressure                            | 7 (2.3%)       |
| Mean arterial pressure                              | 7 (2.3%)       |
| Total cholesterol (mg/dL)                           | 60 (19.5%)     |
| cHDL (mg/dL)                                        | 60 (19.5%)     |
| cLDL (mg/dL)                                        | 60 (19.5%)     |
| Triglycerides (mg/dL)                               | 60 (19.5%)     |
| Atherogenic index                                   | 60 (19.5%)     |
| Glucose (mg/dL)                                     | 59 (19.2%)     |
| Insulin (μU/mL)                                     | 77 (25.1%)     |
| HOMA index                                          | 77 (25.1%)     |
| <b>At 8 years</b>                                   |                |
| Mean daily energy intake (cals)                     | 21 (6.8%)      |
| Weekly out-of-school physical activity time (hours) | 19 (6.2%)      |
| Weight (kg)                                         | 15 (4.9%)      |
| Height (cm)                                         | 15 (4.9%)      |
| BMI (kg/m <sup>2</sup> )                            | 15 (4.9%)      |
| Waist circumference (cm)                            | 15 (4.9%)      |
| Waist circumference/Height ratio                    | 15 (4.9%)      |
| Triponderal index (kg/m <sup>3</sup> )              | 15 (4.9%)      |
| Systolic blood pressure                             | 19 (6.2%)      |
| Diastolic blood pressure                            | 19 (6.2%)      |
| Mean arterial pressure                              | 19 (6.2%)      |

|                           |            |
|---------------------------|------------|
| Total cholesterol (mg/dL) | 61 (19.9%) |
| cHDL (mg/dL)              | 63 (20.5%) |
| cLDL (mg/dL)              | 63 (20.5%) |
| Triglycerides (mg/dL)     | 61 (19.9%) |
| Atherogenic index         | 63 (20.5%) |
| Glucose (mg/dL)           | 61 (19.9%) |
| Insulin (μU/mL)           | 71 (23.1%) |
| HOMA index                | 72 (23.5%) |

---
